# Supplementary material for: A Comprehensive Literature Review of Treatment-Emergent Integrase Resistance with Dolutegravir-Based Regimens in Real-World Settings
Source: MDPI journal article supplement (doi:10.3390/v15122426), 2023-12-14

**Figure S1. (A)** Flow chart of manuscript selection process. 802 studies were identified through a PubMed search performed in July 2023 using the search string defined in Table S1. Of 698 included for screening, 58 studies met inclusion criteria, containing data on DTG resistance and mutations emerging under DTG selection pressure in case studies and retrospective analyses. An additional 2 publications were added post hoc after a manual search of screened abstract titles from the abstract selection process. **(B)** Flow chart of abstract selection process. 982 abstracts were identified through Embase, Cochrane, and manual congress searches performed in July 2023 using the search strings defined in Tables S2 and S3. Of those included for screening, 38 studies met inclusion criteria, containing data on DTG resistance and mutations emerging under DTG selection pressure in case studies and retrospective analyses. A post hoc manual search was performed on October 20, 2023, to capture IDWeek and EACS 2023 congress materials (n=6), 3 of which met screening inclusion criteria. Manual congress searches were conducted for the following: Asian Conference on Hepatitis and AIDS, Alliance Francophone de Acteurs de santé contre le VIH, International AIDS Society/International AIDS Conference, Australasian HIV & AIDS Conference, National Conference of AIDS Society of India, British Association for Sexual Health and HIV, British HIV Association Spring Conference, Canadian Conference on HIV/AIDS Research, Conference on Retroviruses and Opportunistic Infections, EACS, Grupo de Estudio del SIDA-SEIMC, HIV Drug Therapy Glasgow, HIV & Hepatitis in the Americas, The HIV Netherlands Australia Thailand Research Collaboration, International Conference on Antiviral Research, International Conference on AIDS and STIs in Africa, International Congress on Infectious Diseases, IDWeek, Professional Society for Health Economics and Outcomes Research (ISPOR), Japanese Society for AIDS Research, Kenya Association of Physicians, and Société Française de Lutte contre le Sida. DTG, dolutegravir; EACS, European AIDS Clinical Society; INSTI, integrase strand transfer inhibitor; STI, sexually transmitted infection. <sup>a</sup>Non-relevant study types included interventional/randomized controlled trials, in vitro/animal/other preclinical, general reviews, opinion/comments/perspective pieces,

news/guidelines/expert opinion, congress summaries/books, cost-effectiveness/modeling studies, pediatric studies, publication duplication, non-disease/product focused, assay development (technical assay development studies), and erratum.

**A**

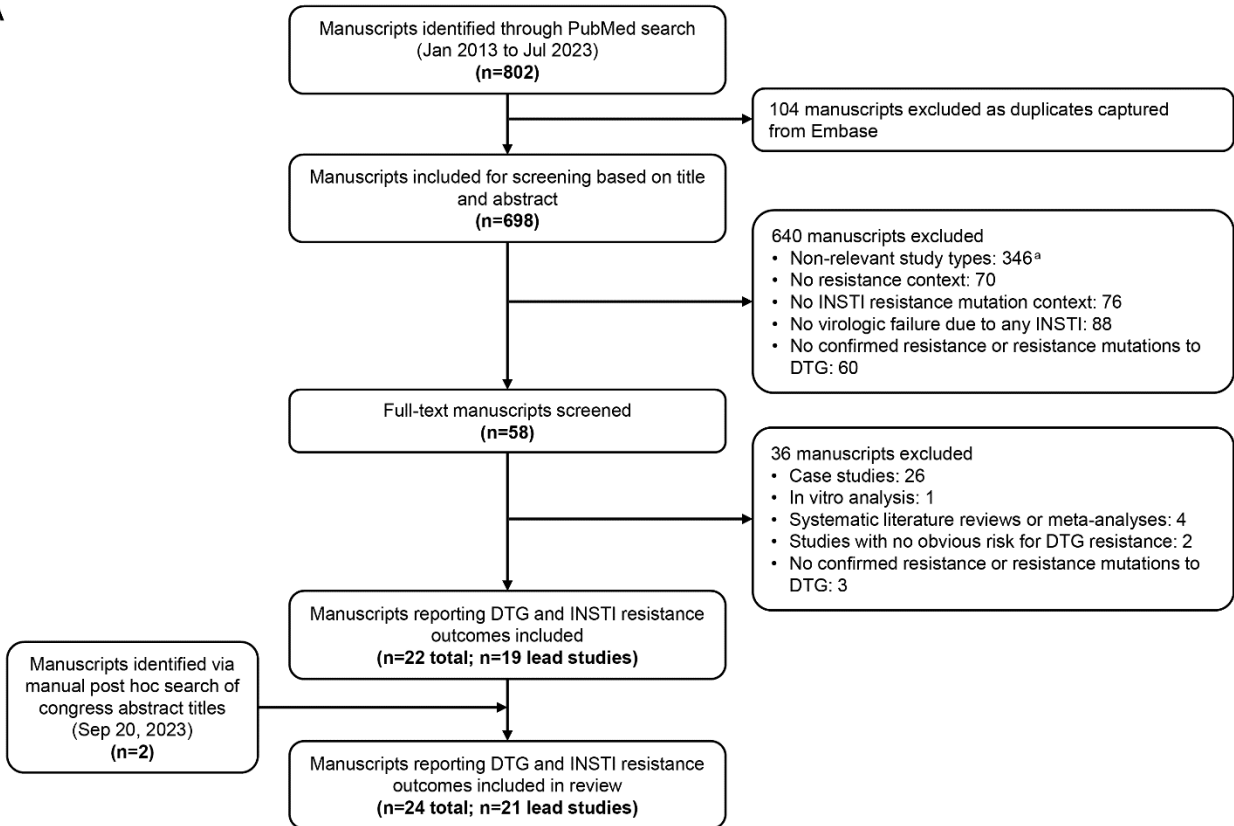

**B**

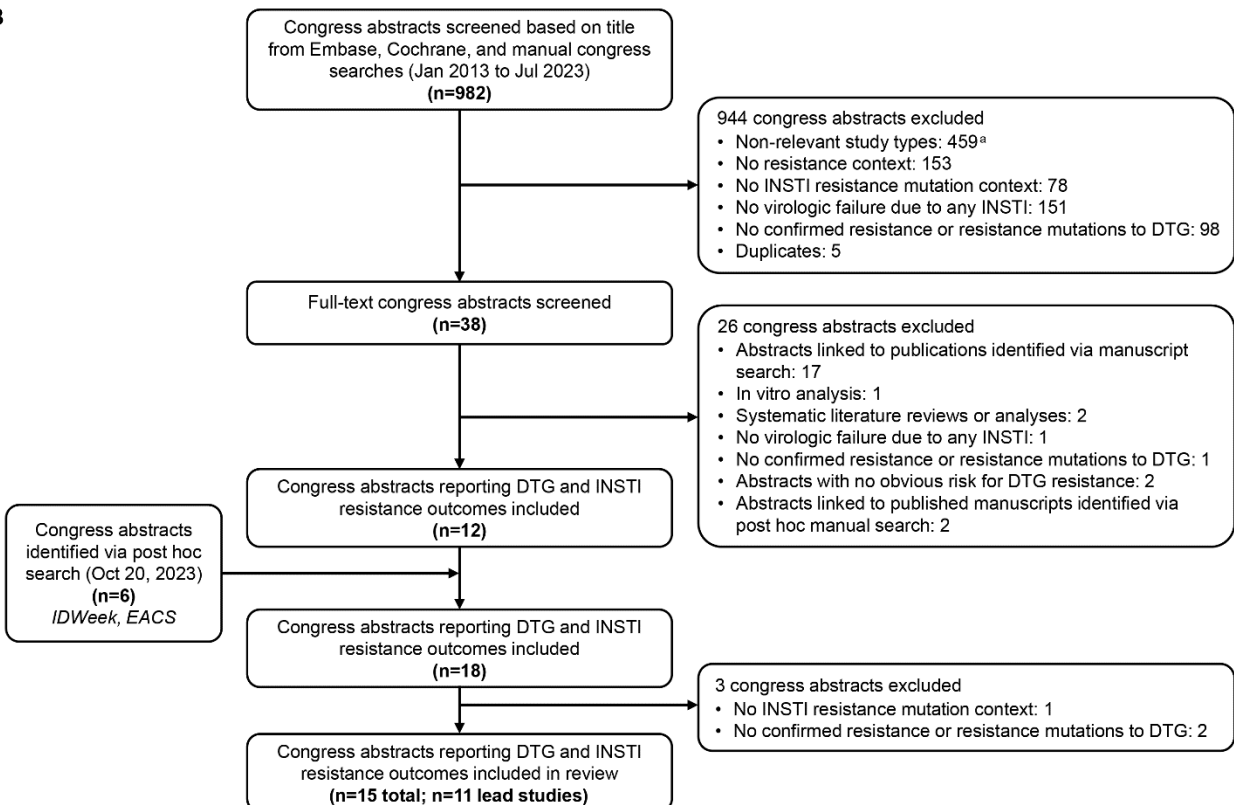

Supplement: s1 [file s1]
