# Supplementary material for: A Comprehensive Literature Review of Treatment-Emergent Integrase Resistance with Dolutegravir-Based Regimens in Real-World Settings
Source: MDPI journal article supplement (doi:10.3390/v15122426), 2023-12-14
Supplement: s1 [file s1]

**Table S3.** Cochrane Search Strategy for Manuscripts (July 25, 2023)

| Search | Query                                                                                                                                                                                                                                                                                                                                                                                                                                                                                                                                                                                                                                                                                                                                                                                    | Results |
|--------|------------------------------------------------------------------------------------------------------------------------------------------------------------------------------------------------------------------------------------------------------------------------------------------------------------------------------------------------------------------------------------------------------------------------------------------------------------------------------------------------------------------------------------------------------------------------------------------------------------------------------------------------------------------------------------------------------------------------------------------------------------------------------------------|---------|
| #13    | #8 AND #12 with Publication Year from 2013 to 2023, in Trials                                                                                                                                                                                                                                                                                                                                                                                                                                                                                                                                                                                                                                                                                                                            | 182     |
| #12    | #9 OR #10 OR #11                                                                                                                                                                                                                                                                                                                                                                                                                                                                                                                                                                                                                                                                                                                                                                         | 18,295  |
| #11    | "3 PPT" OR "A49G" OR "A539V" OR "A556T" OR "CRF14" OR "D232N" OR "E138A" OR "E138K" OR "E138T" OR "E147Q2" OR "E157Q" OR "E92G" OR "E92Q" OR "E92V" OR "F121Y" OR "G118R" OR "G140A" OR "G140C" OR "G140R" OR "G140S" OR "G149A" OR "G163E" OR "G163K" OR "G163R" OR "G19S" OR "H51Y" OR "INRAMS" OR "K65R" OR "K70E" OR "L101I" OR "L74F" OR "L74I" OR "L74M" OR "M184V" OR "M50I" OR "M50V" OR "N155D" OR "N155H" OR "N155S" OR "N155T" OR "P145S" OR "polypurine tract" OR "Q146P" OR "Q148H" OR "Q148K" OR "Q148N" OR "Q148R" OR "Q95K" OR "R263K" OR "S147G" OR "S153A" OR "S153F" OR "S153Y" OR "S230R" OR "T124A" OR "T661" OR "T66A" OR "T66I" OR "T66K" OR "T97A" OR "V151A" OR "V151I" OR "V151L" OR "Y143A" OR "Y143C" OR "Y143G" OR "Y143H" OR "Y143K" OR "Y143R" OR "Y143S" | 252     |
| #10    | "resist*" OR "virological failure" OR "viral failure" OR "incomplete virologic response" OR "incomplete viral response" OR "mutation" OR "mutations"                                                                                                                                                                                                                                                                                                                                                                                                                                                                                                                                                                                                                                     | 17,921  |
| #9     | MeSH descriptor: [Drug Resistance, Viral] explode all trees                                                                                                                                                                                                                                                                                                                                                                                                                                                                                                                                                                                                                                                                                                                              | 793     |
| #8     | #6 AND #7                                                                                                                                                                                                                                                                                                                                                                                                                                                                                                                                                                                                                                                                                                                                                                                | 815     |
| #7     | "dolutegravir" OR "dolutegravir sodium" OR "dolutegravir sodium monohydrate" OR "gsk572" OR "gsk 572" OR "gsk 1349572" OR "gsk1349572" OR "gsk 1349572a" OR "gsk1349572a" OR "s gsk 1349572" OR "s gsk1349572" OR "s1349572" OR "s 1349572" OR "s349572" OR "s 349572" OR "dtg":ab,ti OR "tivica" OR "juluca" OR "trumeq" OR "dovato"                                                                                                                                                                                                                                                                                                                                                                                                                                                    | 973     |
| #6     | #1 OR #2 OR #3 OR #4 OR #5                                                                                                                                                                                                                                                                                                                                                                                                                                                                                                                                                                                                                                                                                                                                                               | 36,857  |
| #5     | "plwh":ab,ti OR aids:ab,ti OR ("acquired immun*" AND "deficiency virus") OR ("acquir*" AND ("immun*" OR "immunodeficiency" OR "immunodeficiency" OR "virus" OR "infection*"))                                                                                                                                                                                                                                                                                                                                                                                                                                                                                                                                                                                                            | 10,424  |
| #4     | MeSH descriptor: [Acquired Immunodeficiency Syndrome] explode all trees                                                                                                                                                                                                                                                                                                                                                                                                                                                                                                                                                                                                                                                                                                                  | 2267    |
| #3     | hiv:ab,ti OR "hiv 1":ab,ti OR "hiv 2":ab,ti OR hiv1:ab,ti OR hiv2:ab,ti OR "hiv i":ab,ti OR "hiv ii":ab,ti OR "hiv infection":ab,ti OR "hiv infect*":ab,ti                                                                                                                                                                                                                                                                                                                                                                                                                                                                                                                                                                                                                               | 29,001  |
| #2     | "human immunodeficiency virus" OR "human immunodeficiency virus" OR ("human" AND ("immun*" OR "immunodeficiency" OR "immunodeficiency") AND ("virus" OR "infection*")) OR ("human immun*" AND "deficiency virus")                                                                                                                                                                                                                                                                                                                                                                                                                                                                                                                                                                        | 15,043  |
| #1     | MeSH descriptor: [HIV] explode all trees                                                                                                                                                                                                                                                                                                                                                                                                                                                                                                                                                                                                                                                                                                                                                 | 3750    |

Results (182; search #13) exported, de-duped, and screened (61 articles; 81 congress abstracts and 40 trial overviews excluded).
