# Supplementary material for: A Comprehensive Literature Review of Treatment-Emergent Integrase Resistance with Dolutegravir-Based Regimens in Real-World Settings
Source: MDPI journal article supplement (doi:10.3390/v15122426), 2023-12-14
Supplement: s1 [file s1]

**Table S2.** Embase Search Strategy for Manuscripts (July 25, 2023)

| Search | Query                                                                                                                                                                                                                                                                                                                                                                                                                                                                                                                                                                                                                                                                                                                                                                                                                                                                                                                                                                                                                                                                                                                                                       | Results    |
|--------|-------------------------------------------------------------------------------------------------------------------------------------------------------------------------------------------------------------------------------------------------------------------------------------------------------------------------------------------------------------------------------------------------------------------------------------------------------------------------------------------------------------------------------------------------------------------------------------------------------------------------------------------------------------------------------------------------------------------------------------------------------------------------------------------------------------------------------------------------------------------------------------------------------------------------------------------------------------------------------------------------------------------------------------------------------------------------------------------------------------------------------------------------------------|------------|
| #20    | #18 NOT #19                                                                                                                                                                                                                                                                                                                                                                                                                                                                                                                                                                                                                                                                                                                                                                                                                                                                                                                                                                                                                                                                                                                                                 | 482        |
| #19    | #18 AND [medline]/lim                                                                                                                                                                                                                                                                                                                                                                                                                                                                                                                                                                                                                                                                                                                                                                                                                                                                                                                                                                                                                                                                                                                                       | 488        |
| #18    | #17 AND [embase]/lim                                                                                                                                                                                                                                                                                                                                                                                                                                                                                                                                                                                                                                                                                                                                                                                                                                                                                                                                                                                                                                                                                                                                        | 970        |
| #17    | #16 AND [2013-2023]/py                                                                                                                                                                                                                                                                                                                                                                                                                                                                                                                                                                                                                                                                                                                                                                                                                                                                                                                                                                                                                                                                                                                                      | 991        |
| #16    | #15 NOT ('review':de OR 'editorial':de OR 'addresses':de OR 'biography':de OR 'comment':de OR 'directory':de OR 'festschrift':de OR 'interview':de OR 'legislation':de OR 'news':de OR 'newspaper article':de OR 'patient education handout':de OR 'consensus development conference':de OR 'consensus development conference, nih':de OR 'practice guideline':de)                                                                                                                                                                                                                                                                                                                                                                                                                                                                                                                                                                                                                                                                                                                                                                                          | 1022       |
| #15    | #14 NOT ('animal'/exp NOT 'human'/exp)                                                                                                                                                                                                                                                                                                                                                                                                                                                                                                                                                                                                                                                                                                                                                                                                                                                                                                                                                                                                                                                                                                                      | 1293       |
| #14    | #12 AND #13                                                                                                                                                                                                                                                                                                                                                                                                                                                                                                                                                                                                                                                                                                                                                                                                                                                                                                                                                                                                                                                                                                                                                 | 1301       |
| #13    | 'cohort analysis':ab,ti OR cohort:ab,ti OR 'follow up':ab,ti OR followup:ab,ti OR 'clinical article':ab,ti OR 'non interventional':ab,ti OR 'noninterventional':ab,ti OR effectiveness:ab,ti OR register:ab,ti OR regist*:ab,ti OR database:ab,ti OR 'data base':ab,ti OR 'real world':ab,ti OR 'real life':ab,ti OR 'health record':ab,ti OR 'health care record':ab,ti OR 'healthcare record':ab,ti OR 'health records':ab,ti OR 'health care records':ab,ti OR 'healthcare records':ab,ti OR 'medical record':ab,ti OR 'medical records':ab,ti OR questionnaire:ab,ti OR survey*:ab,ti OR ((medical:ab,ti OR insurance:ab,ti) AND (claim:ab,ti OR claims:ab,ti)) OR 'billing data':ab,ti OR ((pragmatic:ab,ti OR observation*:ab,ti OR prospective:ab,ti OR retrospective:ab,ti OR 'longitudinal':ab,ti OR 'cross sectional':ab,ti OR clinical:ab,ti) AND (trial:ab,ti OR trials:ab,ti OR study:ab,ti OR studies:ab,ti)) OR (case:ab,ti AND (study:ab,ti OR studies:ab,ti OR series:ab,ti OR large:ab,ti OR control*:ab,ti)) OR ((treatment:ab,ti OR prescrib*:ab,ti OR prescription*:ab,ti) AND (practice*:ab,ti OR practise*:ab,ti OR pattern*:ab,ti)) | 10,698,751 |
| #12    | #8 AND #11                                                                                                                                                                                                                                                                                                                                                                                                                                                                                                                                                                                                                                                                                                                                                                                                                                                                                                                                                                                                                                                                                                                                                  | 2271       |
| #11    | #9 OR #10                                                                                                                                                                                                                                                                                                                                                                                                                                                                                                                                                                                                                                                                                                                                                                                                                                                                                                                                                                                                                                                                                                                                                   | 3,110,380  |
| #10    | 3 ppt' OR 'a49g' OR 'a539v' OR 'a556t' OR 'crf14' OR 'd232n' OR 'e138a' OR 'e138k' OR 'e138t' OR 'e147q2' OR 'e157q' OR 'e92g' OR 'e92q' OR 'e92v' OR 'f121y' OR 'g118r' OR 'g140a' OR 'g140c' OR 'g140r' OR 'g140s' OR 'g149a' OR 'g163e' OR 'g163k' OR 'g163r' OR 'g19s' OR 'h51y' OR 'inrams' OR 'k65r' OR 'k70e' OR 'l101i' OR 'l74f' OR 'l74i' OR 'l74m' OR 'm184v' OR 'm50i' OR 'm50v' OR 'n155d' OR 'n155h' OR 'n155s' OR 'n155t' OR 'p145s' OR 'polypurine tract' OR 'q146p' OR 'q148h' OR 'q148k' OR 'q148n' OR 'q148r' OR 'q95k' OR 'r263k' OR 's147g' OR 's153a' OR 's153f' OR 's153y' OR 's230r' OR 't124a' OR 't661' OR 't66a' OR 't66i' OR 't66k' OR 't97a' OR 'v151a' OR 'v151i' OR 'v151l' OR 'y143a' OR 'y143c' OR 'y143g' OR 'y143h' OR 'y143k' OR 'y143r' OR 'y143s'                                                                                                                                                                                                                                                                                                                                                                     | 3694       |
| #9     | antiviral resistance'/exp OR 'resist*' OR 'virological failure' OR 'viral failure' OR 'incomplete virologic response' OR 'incomplete viral response' OR 'mutation' OR 'mutations'                                                                                                                                                                                                                                                                                                                                                                                                                                                                                                                                                                                                                                                                                                                                                                                                                                                                                                                                                                           | 3,109,818  |
| #8     | #6 AND #7                                                                                                                                                                                                                                                                                                                                                                                                                                                                                                                                                                                                                                                                                                                                                                                                                                                                                                                                                                                                                                                                                                                                                   | 6010       |

|    |                                                                                                                                                                                                                                                                                                                                      |           |
|----|--------------------------------------------------------------------------------------------------------------------------------------------------------------------------------------------------------------------------------------------------------------------------------------------------------------------------------------|-----------|
| #7 | dolutegravir' OR 'dolutegravir sodium' OR 'dolutegravir sodium monohydrate' OR 'gsk572' OR 'gsk 572' OR 'gsk 1349572' OR 'gsk1349572' OR 'gsk 1349572a' OR 'gsk1349572a' OR 's gsk 1349572' OR 's gsk1349572' OR 's1349572' OR 's 1349572' OR 's349572' OR 's 349572' OR 'dtg':ab,ti OR 'tivica' OR 'juluca' OR 'trumeq' OR 'dovato' | 8588      |
| #6 | #1 OR #2 OR #3 OR #4 OR #5                                                                                                                                                                                                                                                                                                           | 2,022,314 |
| #5 | plwh':ab,ti OR aids:ab,ti OR ('acquired immun*' AND 'deficiency virus') OR (acquir* AND (immun* OR immunodeficiency OR immunodeficiency OR virus OR infection*))                                                                                                                                                                     | 445,246   |
| #4 | acquired immune deficiency syndrome'/exp                                                                                                                                                                                                                                                                                             | 559,029   |
| #3 | hiv:ab,ti OR 'hiv 1':ab,ti OR 'hiv 2':ab,ti OR hiv1:ab,ti OR hiv2:ab,ti OR 'hiv i':ab,ti OR 'hiv ii':ab,ti OR 'hiv infection':ab,ti OR 'hiv infect*':ab,ti                                                                                                                                                                           | 455,391   |
| #2 | human immunodeficiency virus' OR 'human immunodeficiency virus' OR (human AND (immun* OR immunodeficiency OR immunodeficiency) AND (virus OR infection*)) OR ('human immun*' AND 'deficiency virus')                                                                                                                                 | 1,434,094 |
| #1 | 'human immunodeficiency virus infection'/exp OR 'human immunodeficiency virus infection'                                                                                                                                                                                                                                             | 804,964   |

Results (482; search #20) exported, de-duped, and screened (108 manuscripts; 373 congress abstracts and 1 congress review excluded).
