# Supplementary material for: A Comprehensive Literature Review of Treatment-Emergent Integrase Resistance with Dolutegravir-Based Regimens in Real-World Settings
Source: MDPI journal article supplement (doi:10.3390/v15122426), 2023-12-14
Supplement: s1 [file s1]

**Table S1.** PubMed Search Strategy for Manuscripts (July 25, 2023)

| Search | Query                                                                                                                                                                                                                                                                                                                                                                                                                                                                                                                                                                                                                                                                                                                                                                                                                                                                                                                                                                                                                                                                                                                                                                               | Results   |
|--------|-------------------------------------------------------------------------------------------------------------------------------------------------------------------------------------------------------------------------------------------------------------------------------------------------------------------------------------------------------------------------------------------------------------------------------------------------------------------------------------------------------------------------------------------------------------------------------------------------------------------------------------------------------------------------------------------------------------------------------------------------------------------------------------------------------------------------------------------------------------------------------------------------------------------------------------------------------------------------------------------------------------------------------------------------------------------------------------------------------------------------------------------------------------------------------------|-----------|
| #13    | Search: #12 NOT ("Review"[Publication Type] OR "Editorial"[Publication Type] OR "biography"[Publication Type] OR "comment"[Publication Type] OR "directory"[Publication Type] OR "festschrift"[Publication Type] OR "interview"[Publication Type] OR "legislation"[Publication Type] OR "news"[Publication Type] OR "newspaper article"[Publication Type] OR "patient education handout"[Publication Type] OR "consensus development conference"[Publication Type] OR "consensus development conference, nih"[Publication Type] OR "practice guideline"[Publication Type]) Filters: from 2013 - 2023 Sort by: Most Recent                                                                                                                                                                                                                                                                                                                                                                                                                                                                                                                                                           | 633       |
| #12    | Search: #8 AND #11 Sort by: Most Recent                                                                                                                                                                                                                                                                                                                                                                                                                                                                                                                                                                                                                                                                                                                                                                                                                                                                                                                                                                                                                                                                                                                                             | 813       |
| #11    | Search: #9 OR #10 Sort by: Most Recent                                                                                                                                                                                                                                                                                                                                                                                                                                                                                                                                                                                                                                                                                                                                                                                                                                                                                                                                                                                                                                                                                                                                              | 2,268,176 |
| #10    | Search: "3 PPT"[all] OR "A49G"[all] OR "A539V"[all] OR "A556T"[all] OR "CRF14"[all] OR "D232N"[all] OR "E138A"[all] OR "E138K"[all] OR "E138T"[all] OR "E147Q2"[all] OR "E157Q"[all] OR "E92G"[all] OR "E92Q"[all] OR "E92V"[all] OR "F121Y"[all] OR "G118R"[all] OR "G140A"[all] OR "G140C"[all] OR "G140R"[all] OR "G140S"[all] OR "G149A"[all] OR "G163E"[all] OR "G163K"[all] OR "G163R"[all] OR "G19S"[all] OR "H51Y"[all] OR "INRAMS"[all] OR "K65R"[all] OR "K70E"[all] OR "L101I"[all] OR "L74F"[all] OR "L74I"[all] OR "L74M"[all] OR "M184V"[all] OR "M50I"[all] OR "M50V"[all] OR "N155D"[all] OR "N155H"[all] OR "N155S"[all] OR "N155T"[all] OR "P145S"[all] OR "polypurine tract"[all] OR "Q146P"[all] OR "Q148H"[all] OR "Q148K"[all] OR "Q148N"[all] OR "Q148R"[all] OR "Q95K"[all] OR "R263K"[all] OR "S147G"[all] OR "S153A"[all] OR "S153F"[all] OR "S153Y"[all] OR "S230R"[all] OR "T124A"[all] OR "T66I"[all] OR "T66A"[all] OR "T66I"[all] OR "T66K"[all] OR "T97A"[all] OR "V151A"[all] OR "V151I"[all] OR "V151L"[all] OR "Y143A"[all] OR "Y143C"[all] OR "Y143G"[all] OR "Y143H"[all] OR "Y143K"[all] OR "Y143R"[all] OR "Y143S"[all] Sort by: Most Recent | 2551      |
| #9     | Search: "Drug Resistance, Viral"[Mesh] OR "resist*" OR "virological failure"[all] OR "viral failure"[all] OR "incomplete virologic response"[all] OR "incomplete viral response"[all] OR "mutation"[all] OR "mutations"[all] Sort by: Most Recent                                                                                                                                                                                                                                                                                                                                                                                                                                                                                                                                                                                                                                                                                                                                                                                                                                                                                                                                   | 2,267,731 |
| #8     | Search: #6 AND #7 Sort by: Most Recent                                                                                                                                                                                                                                                                                                                                                                                                                                                                                                                                                                                                                                                                                                                                                                                                                                                                                                                                                                                                                                                                                                                                              | 1837      |
| #7     | Search: "dolutegravir" OR "dolutegravir sodium" OR "dolutegravir sodium monohydrate" OR "gsk572" OR "gsk 572" OR "gsk 1349572" OR "gsk1349572" OR "gsk 1349572a" OR "gsk1349572a" OR "s gsk 1349572" OR "s gsk1349572" OR "s1349572" OR "s 1349572" OR "s349572" OR "s 349572" OR "dtg"[tiab] OR "tivica" OR "juluca" OR "trimeq" OR "dovato" Sort by: Most Recent                                                                                                                                                                                                                                                                                                                                                                                                                                                                                                                                                                                                                                                                                                                                                                                                                  | 4019      |
| #6     | Search: #1 OR #2 OR #3 OR #4 OR #5 Sort by: Most Recent                                                                                                                                                                                                                                                                                                                                                                                                                                                                                                                                                                                                                                                                                                                                                                                                                                                                                                                                                                                                                                                                                                                             | 850,869   |
| #5     | Search: "plwh"[tiab] OR aids[tiab] OR ("acquired immun*" AND "deficiency virus") OR ("acquir*" AND ("immun*" OR "immunodeficiency" OR "immunodeficiency" OR "virus" OR "infection*")) Sort by: Most Recent                                                                                                                                                                                                                                                                                                                                                                                                                                                                                                                                                                                                                                                                                                                                                                                                                                                                                                                                                                          | 338,061   |
| #4     | Search: "Acquired Immunodeficiency Syndrome"[Mesh] Sort by: Most Recent                                                                                                                                                                                                                                                                                                                                                                                                                                                                                                                                                                                                                                                                                                                                                                                                                                                                                                                                                                                                                                                                                                             | 78,606    |

|                                                   |                                                                                                                                                                                                                                                |         |
|---------------------------------------------------|------------------------------------------------------------------------------------------------------------------------------------------------------------------------------------------------------------------------------------------------|---------|
| #3                                                | Search: hiv[tiab] OR "hiv 1"[tiab] OR "hiv 2"[tiab] OR hiv1[tiab] OR hiv2[tiab] OR "hiv i"[tiab] OR "hiv ii"[tiab] OR "hiv infection"[tiab] OR "hiv infect*"[tiab] Sort by: Most Recent                                                        | 356,198 |
| #2                                                | Search: "human immunodeficiency virus" OR "human immunodeficiency virus" OR ("human" AND ("immun*" OR "immunodeficiency" OR "immunodeficiency")) AND ("virus" OR "infection*") OR ("human immun*" AND "deficiency virus") Sort by: Most Recent | 388,953 |
| #1                                                | Search: "HIV"[Mesh] Sort by: Most Recent                                                                                                                                                                                                       | 107,586 |
| Results (633) exported and screened (search #13). |                                                                                                                                                                                                                                                |         |
